# Supplementary material
Source: PubMed Central journal article supplement (PMC9912908)
Supplement: NIHMS1870555-supplement-1.pdf [file NIHMS1870555-supplement-1.pdf]

## Supplementary material

**Supplementary Table 1:** Polyp datasets used in our experiments with number of images, input size and their availability. For some indicated dataset test data are not available (e.g. BKAI) for which we used training data and split it into 80:10:10 for train, validation and test. Also, we use small, flat and sessile polyps in Kvasir-SEG.

| Dataset                     | Images            | Input size       | Availability |
|-----------------------------|-------------------|------------------|--------------|
| Kvasir-SEG                  | 1000              | Variable         | Public       |
| CVC-ClinicDB                | 612               | $384 \times 288$ | Public       |
| BKAI                        | 1000 <sup>†</sup> | Variable         | Public       |
| Kvasir-Sessile <sup>◊</sup> | 196               | Variable         | Public       |

<sup>†</sup> test data unavailable    <sup>◊</sup>sessile polyps from Kvasir-SEG

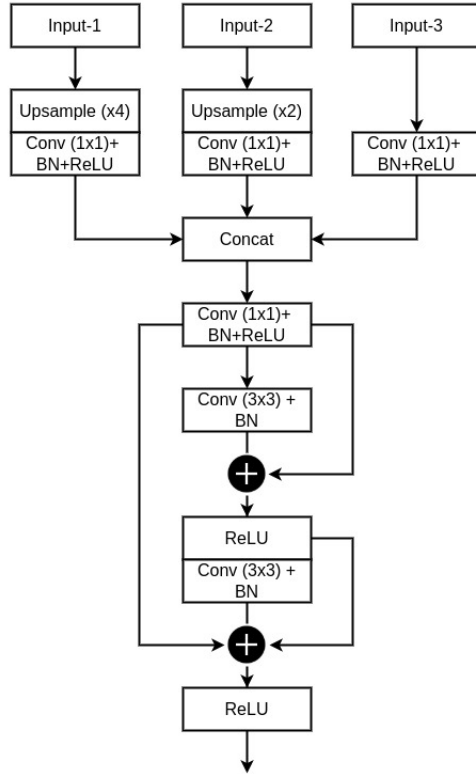

**Suupplementary Figure 1:** Block diagram of the proposed multi-scale fusion aggregation module that takes different scale features from three decoder blocks and concatenates them using upsampling, convolution, batch normalization and ReLU activations. Also, we apply residual-connections for different layers as shown.

**Suupplementary Table 2:** Algorithm complexity of methods used in the study. Number of model parameters, flops, image size and frame-per-second is provided for both state-of-the-art (SOTA) methods and proposed TGANet.

| Method               | Parameters (Million) | Flops (GMac) | Image Size       | FPS    |
|----------------------|----------------------|--------------|------------------|--------|
| U-Net                | 31.04                | 54.75        | $256 \times 256$ | 164.93 |
| HarDNet-MSEG         | 33.34                | 6.02         | $256 \times 256$ | 42.95  |
| ColonSegNet          | 5.01                 | 62.16        | $256 \times 256$ | 127.95 |
| DeepLabV3+           | 39.76                | 43.31        | $256 \times 256$ | 99.79  |
| PraNet               | 32.55                | 6.93         | $256 \times 256$ | 36.90  |
| <b>TGANet (Ours)</b> | 19.84                | 41.88        | $256 \times 256$ | 37.64  |
